# Supplementary material for: Facile fabrication and luminescence properties of a new ZnII coordination polymer-based fluorescent sensor toward antibiotics
Source: Royal Society of Chemistry journal article supplement (doi:10.1039/d2nj03797a), 2022-01-01
Supplement: d2nj03797a1.pdf [file d2nj03797a1.pdf]

## ***Electronic Supplementary Information (ESI)***

### **Facile fabrication and luminescent properties of a new Zn<sup>II</sup> coordination polymer-based fluorescence sensor toward antibiotics**

**Jin-Jin Wang, Le-Qian Li, Zi-Hao Zhu,\* Teng-Fei Zheng, Hui Xu, Yan Peng,  
Jing-Lin Chen, Sui-Jun Liu\* and He-Rui Wen**

School of Chemistry and Chemical Engineering, Jiangxi University of Science and  
Technology, Ganzhou 341000, Jiangxi Province, P.R. China.

\*Corresponding authors. E-mail: sjliu@jxust.edu.cn (S.-J. Liu),  
zhuzihao@jxust.edu.cn (Z.-H. Zhu). Tel: +86-797-8312204.

**Table S1.** Selected bond lengths (Å) and angles (°) for **JXUST-17**.

|                                       |            |
|---------------------------------------|------------|
| Zn1—O2                                | 1.9404(15) |
| Zn1—O4 <sup>i</sup>                   | 1.9860(15) |
| Zn1—N1                                | 2.011(2)   |
| Zn1—N3 <sup>ii</sup>                  | 2.0837(19) |
| O2—Zn1—O4 <sup>i</sup>                | 100.37(7)  |
| O2—Zn1—N1                             | 103.90(8)  |
| O4 <sup>i</sup> —Zn1—N1               | 129.84(8)  |
| O2—Zn1—N3 <sup>ii</sup>               | 114.57(7)  |
| O4 <sup>i</sup> —Zn1—N3 <sup>ii</sup> | 104.60(11) |
| N1—Zn1—N3 <sup>ii</sup>               | 104.04(8)  |

<sup>a</sup>Symmetry codes: (i)  $x-1/2, -y, z$ ; (ii)  $x-1/2, -y+1, z$ .

**Table S2.** SHAPE analysis of Zn<sup>II</sup> ion in **JXUST-17**.

| Ions       | Label   | Shape                             | Symmetry | Distortion ( $\tau$ ) |
|------------|---------|-----------------------------------|----------|-----------------------|
| <b>Zn1</b> | SP-4    | Square                            | $D_{4h}$ | 23.496                |
|            | T-4     | Tetrahedron                       | $T_d$    | <b>1.492</b>          |
|            | SS-4    | Seesaw or sawhorse                | $C_{2v}$ | 4.805                 |
|            | Vtbpy-4 | Axially vacant trigonal bipyramid | $C_{3v}$ | 3.464                 |

**Table S3.** The luminescence sensors with turn-off effect based on some selected MOFs/CPs.

| Analyte | MOF/CP                                                    | Luminescence effect | $K_{sv}(M^{-1})$    | LOD( $\mu M$ ) | Ref.      |
|---------|-----------------------------------------------------------|---------------------|---------------------|----------------|-----------|
| NFT     | $[Zn_2(BIBT)(AIPA)_2]_n$                                  | Turn-off            | $1.77 \times 10^6$  | 0.185          | This work |
|         | $\{[Tb_4(BTDI)_3(H_2O)_4] \cdot 4H_2O \cdot solvents\}_n$ |                     | $1.74 \times 10^5$  | 0.39           | [S1]      |
|         | $\{[Mg_2(APDA)_2(H_2O)_3] \cdot 5DMA \cdot 5H_2O\}_n$     |                     | $8.82 \times 10^4$  | 0.53           | [S2]      |
|         | $[Cd_3(TDCPB)(DMAc)_2] \cdot DMAc \cdot 4H_2O$            |                     | $1.05 \times 10^5$  | -----          | [S3]      |
|         | $[Tb_4(BTDI)_3(DMF)_4]_n$                                 |                     | $4.36 \times 10^4$  | 0.86           | [S1]      |
|         | $\{[NaCd_2(L)(BDC)_{2.5}] \cdot 9H_2O\}_n$                |                     | $3.57 \times 10^4$  | 1.15           | [S4]      |
|         | $\{[Tb(TATMA)(H_2O) \cdot 2H_2O]\}_n$                     |                     | $3.35 \times 10^4$  | -----          | [S5]      |
|         | $[CdL(NO_3)_2 \cdot 4H_2O]_n$                             |                     | $4.64 \times 10^4$  | -----          | [S6]      |
|         | $\{[Cd(L)_{0.5}(bpe)_{0.5}(H_2O)] \cdot x(solvents)\}_n$  |                     | $2.0 \times 10^4$   | 0.38           | [S7]      |
|         | $[Cd_3(CBCD)_2(DMA)_4(H_2O)_2] \cdot 10DMA$               |                     | $6.39 \times 10^4$  | 0.128          | [S8]      |
| DCN     | $[Zn_2(BIBT)(AIPA)_2]_n$                                  | Turn-off            | $1.581 \times 10^4$ | 0.981          | This work |
|         | $\{[Tb_4(BTDI)_3(H_2O)_4] \cdot 4H_2O \cdot solvents\}_n$ |                     | $1.23 \times 10^5$  | 0.34           | [S1]      |
|         | $\{[Zn_2(bpdc)_2(BPyTPE)]\}_n$                            |                     | -----               | 0.63           | [S9]      |
|         | $\{[Zn_2(L)_2(TPA)] \cdot 2H_2O\}_n$                      |                     | $2.36 \times 10^4$  | 1.90           | [S10]     |
|         | $[Tb_3(HDDB)(DDB)(H_2O)_6] \cdot NMP \cdot 3H_2O$         |                     | $6.42 \times 10^4$  | 0.14           | [S11]     |
|         | $[Eu_2(dtztp)(OH)_2(DMF)(H_2O)_{2.5}] \cdot 2H_2O$        |                     | $6.25 \times 10^4$  | -----          | [S12]     |

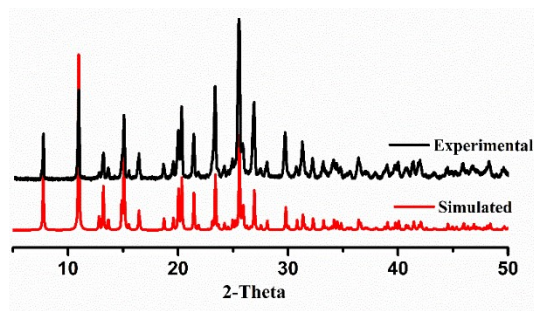

**Fig. S1** The simulated and experimental PXRD patterns of **JXUST-17**.

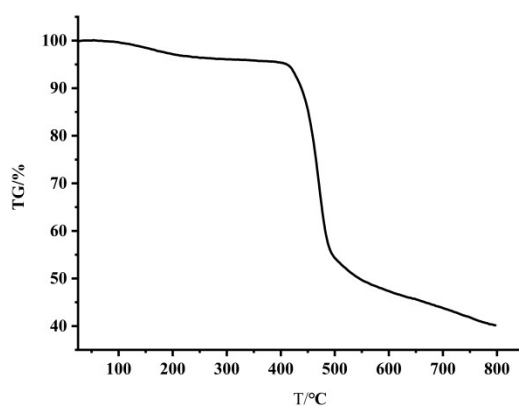

**Fig. S2** The TGA curve of **JXUST-17** under  $N_2$  atmosphere.

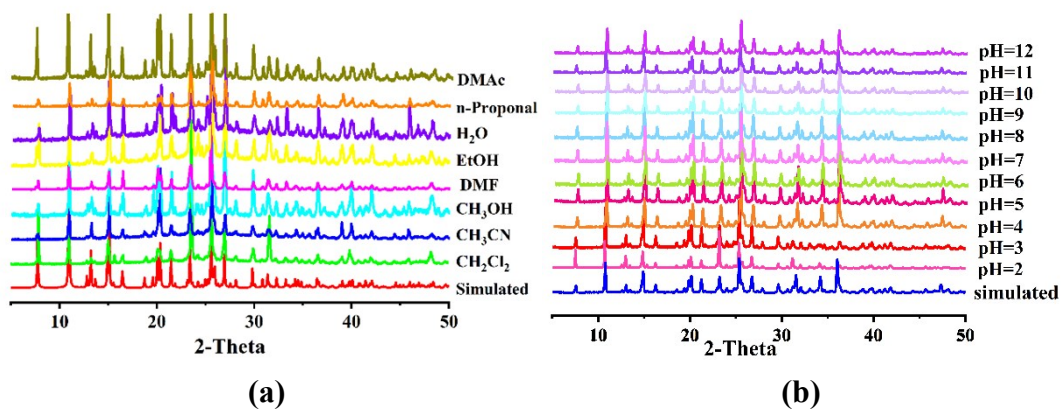

**Fig. S3** (a) The PXRD patterns of **JXUST-17** soaked in different solvents for 24 hours; (b) the PXRD patterns of **JXUST-17** in aqueous solution with different pH values.

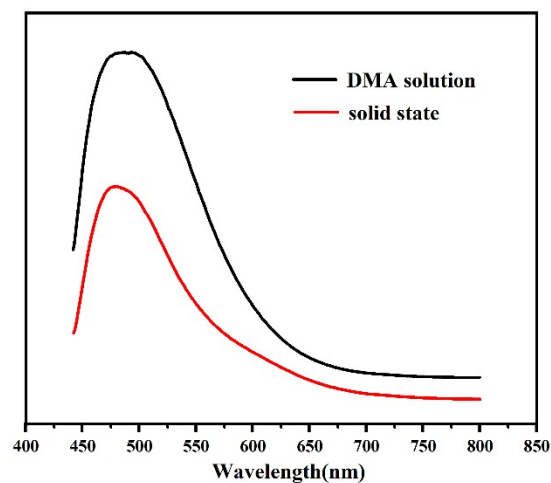

**Fig. S4** The emission spectra of **JXUST-17** in DMA solution and in solid state at room temperature.

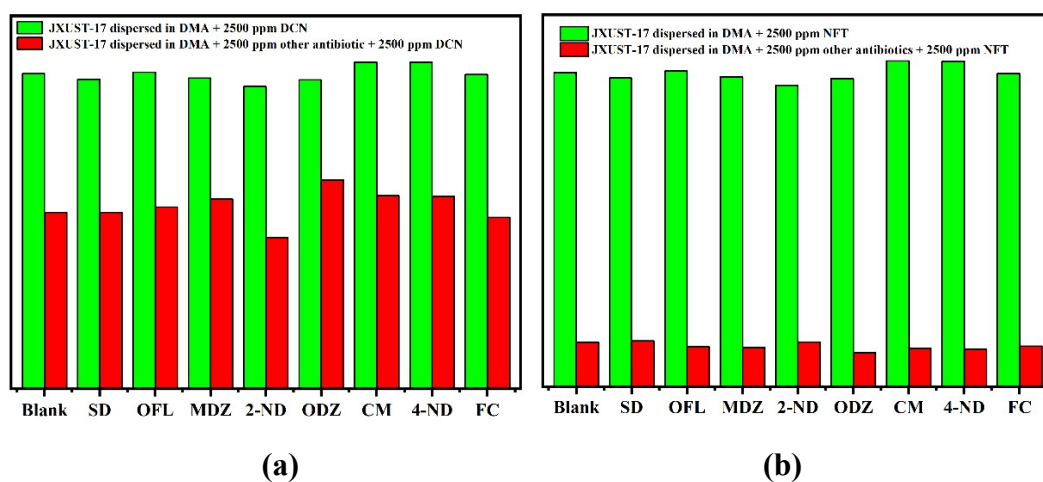

**Fig. S5** Competition experiments of **JXUST-17** with the interference of other antibiotic molecules in DMA and 2500 ppm DCN solution (a); competition experiments of **JXUST-17** with the interference of other antibiotic molecules in DMA and 2500 ppm NFT solution (b).

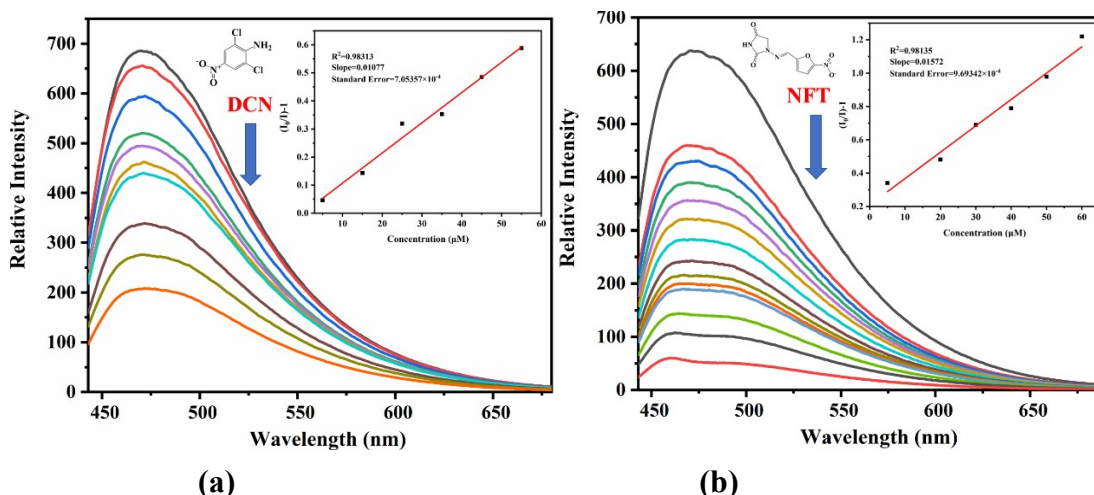

**Fig. S6** Fluorescence emission spectra of JXUST-17 in DMA suspension after various concentrations of DCN and linear fitting of DCN (a) and NFT (b) with fluorescence intensity at low concentrations.

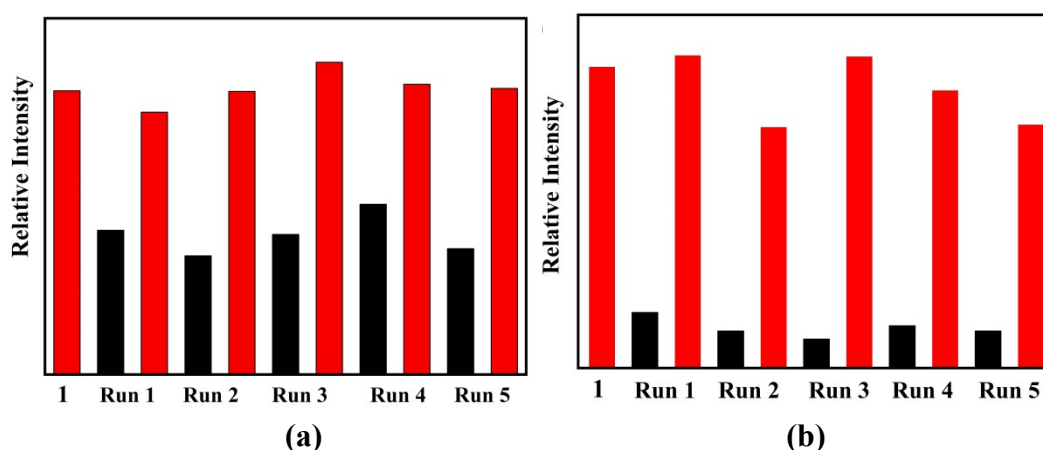

**Fig. S7** Relative fluorescence intensity of JXUST-17 sensing DCN (a) and NFT (b) after five cycles of recycling experiments.

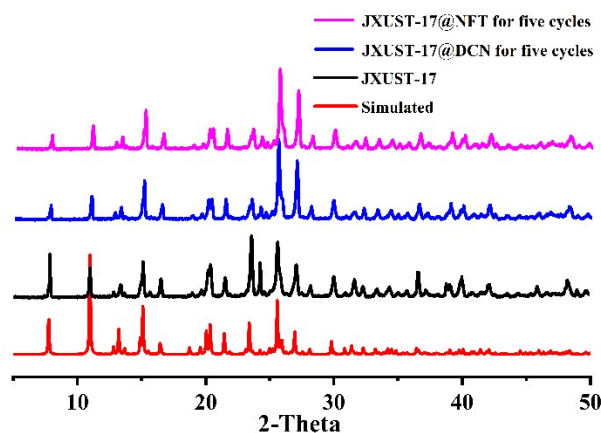

**Fig. S8** The simulated and experimental PXRD patterns of JXUST-17 upon the addition of NFT and DCN after five cycles of recycling experiments.

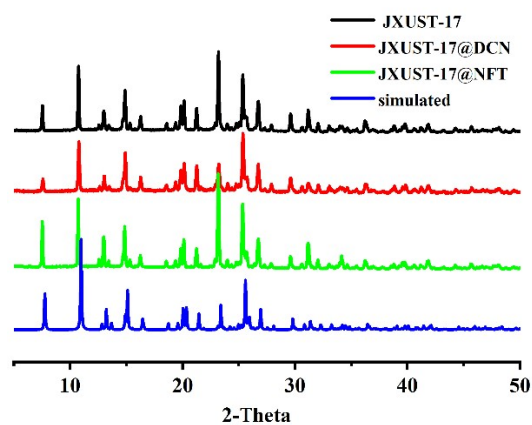

**Fig. S9** The PXR D patterns of JXUST-17 dispersed in DMA solutions containing NFT and DCN.

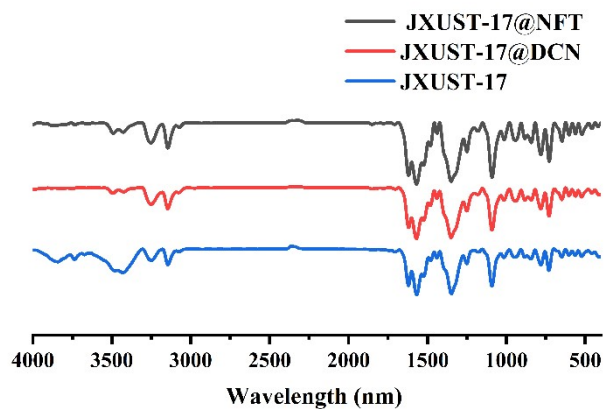

**Fig. S10** IR spectra of JXUST-17, JXUST-17@DCN, and JXUST-17@NFT at room temperature.

## References

- S1. Y. Li, B. L. Chai, H. Xu, T. F. Zheng, J. L. Chen, S. J. Liu and H. R. Wen, *Inorg. Chem. Front.*, 2022, **9**, 1504–1513.
- S2. N. Xu, Q. H. Zhang, B.-S. Hou, Q. Cheng and G.-A. Zhang, *Inorg. Chem.*, 2018, **57**, 13330-13340.
- S3. Q. Q. Zhu, Q. S. Zhou, H. W. Zhang, W. W. Zhang, D. Q. Lu, M. T. Guo, Y. Yuan, F. Sun and H. He, *Inorg. Chem.*, 2020, **59**, 1323–1331.
- S4. D. Zhao, X. H. Liu, Y. Zhao, P. Wang, Y. Liu, M. Azam, S. I. Al-Resayes, Y. Lu and W. Y. Sun, *J. Mater. Chem. A*, 2017, **5**, 15797-15807.
- S5. Q. Q. Zhu, H. He, Y. Yan, J. Yuan, D. Q. Lu, D. Y. Zhang, F. Sun and G. Zhu, *Inorg. Chem.*, 2019, **58**, 7746–7753.
- S6. F. Guo, C. Su, Y. Fan, W. Shi and X. Zhang, *Inorg. Chem.*, 2020, **59**, 7135–7142.
- S7. M. Lei, F. Ge, S. Ren, X. Gao and H. Zheng, *Sep. Purif. Technol.*, 2022, **286**, 120433.
- S8. N. Xu, Q. H. Zhang, G. A. Zhang, *Dalton Trans.* 2019, **48**, 2683–2691.
- S9. C. L. Tao, B. Chen, X. G. Liu, L. J. Zhou, X. L. Zhu, J. Cao, Z. G. Gu, Z. J. Zhao, L. Shen and B. Z. Tang, *Chem. Commun.*, 2017, **53**, 9975-9978.
- S10. X. Y. Guo, Z. P. Dong, F. Zhao, Z. L. Liu and Y. Q. *New J. Chem.*, 2019, **43**, 2353-2361.
- S11. X. Q. Wang, X. Ma, D. Feng, J. Tang, D. Wu, J. Yang and J. Jiao, *Cryst. Growth Des.*, 2021, **21**, 2889–2897.
- S12. G. D. Wang, Y. Z. Li, W. J. Shi, B. Zhang, L. Hou and Y. Y. Wang, *Sens. Actuators B Chem.*, 2021, **331**, 129377.
